# Supplementary figures and images for: Chromosomal location and gene paucity of the male specific region on papaya Y chromosome
Source: Springer Nature journal article supplement (doi:10.1007/s00438-007-0243-z), 2007-05-23

# A 54H01


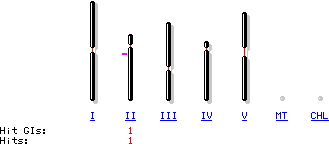


# B 76M08


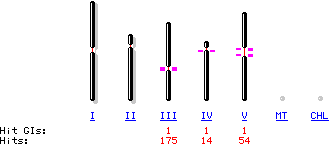


# C 41F24


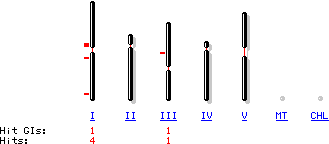


**Color key for scores:**

| **<40** | **40-50** | **50-80** | **80-200** | **>=200** |
| --- | --- | --- | --- | --- |

Supplement: MOESM3 [file 438_2007_243_MOESM3_ESM.doc]
